# Supplementary material for: Insights into the ecology, evolution, and metabolism of the widespread Woesearchaeotal lineages
Source: PubMed Central journal article supplement (PMC5994134; doi:10.1186/s40168-018-0488-2), 2018-06-08
Supplement: 40168_2018_488_MOESM1_ESM.pdf [file 40168_2018_488_MOESM1_ESM.pdf]

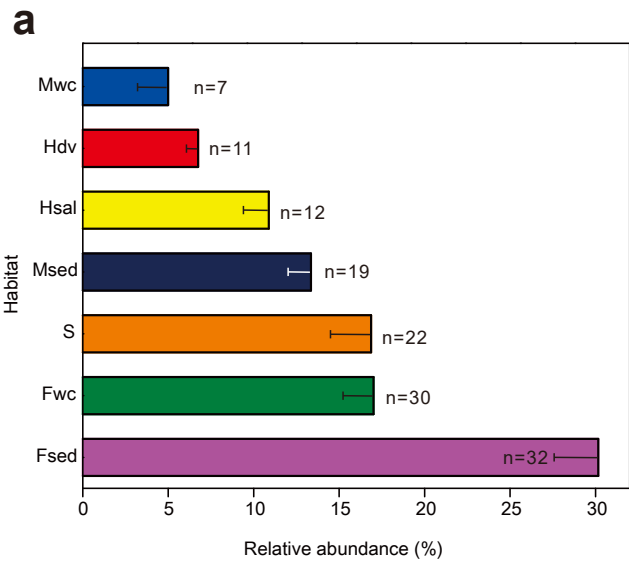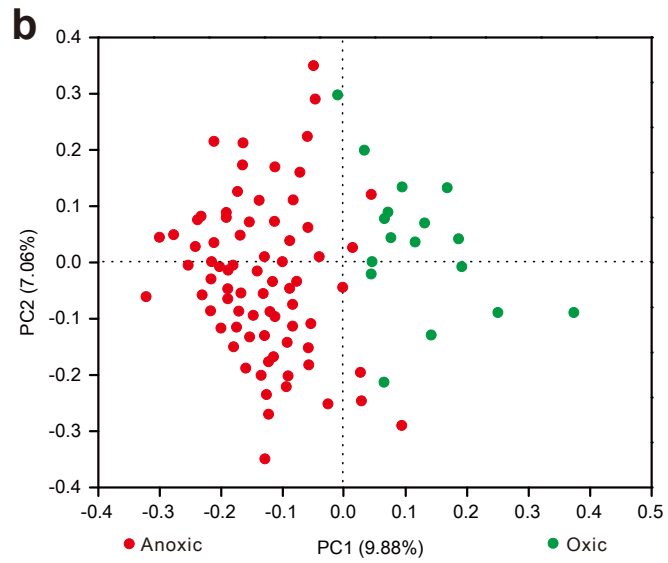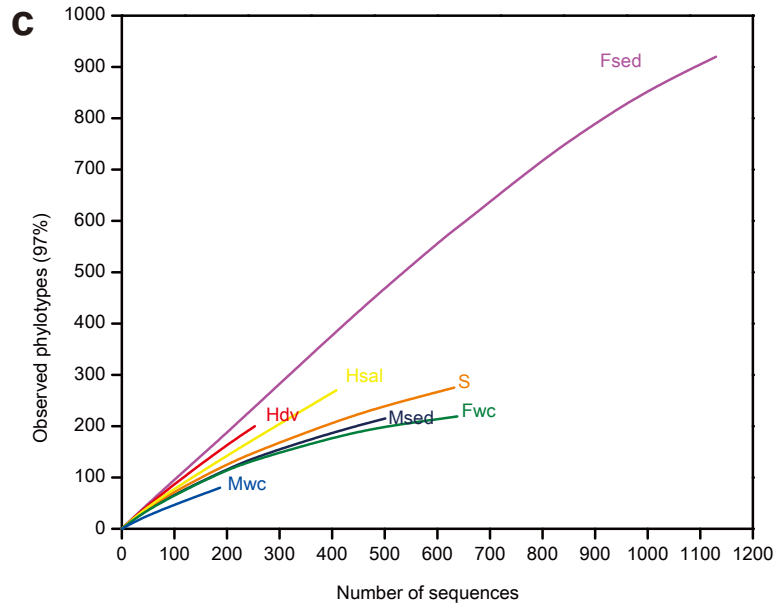

**Supplementary Figure 1 | Profiles of Woesearchaeota in seven types of habitats from 133 libraries or studies.** **a**, Relative abundance of 16S rRNA gene sequences among seven types of habitats. This abundance is based on Woesearchaeotal sequences relative to total archaea sequences within each habitat ([Supplementary Table 1](#)). **b**, Principal coordinate analysis (PCoA) plot obtained using an unweighted UniFrac distance matrix calculated on 133 clone libraries/studies associated with oxidation status (anoxic: red, oxic: green). **c**, Rarefaction curves for Woesearchaeotal diversity in the seven habitats. OTUs were calculated at a 97% cutoff.

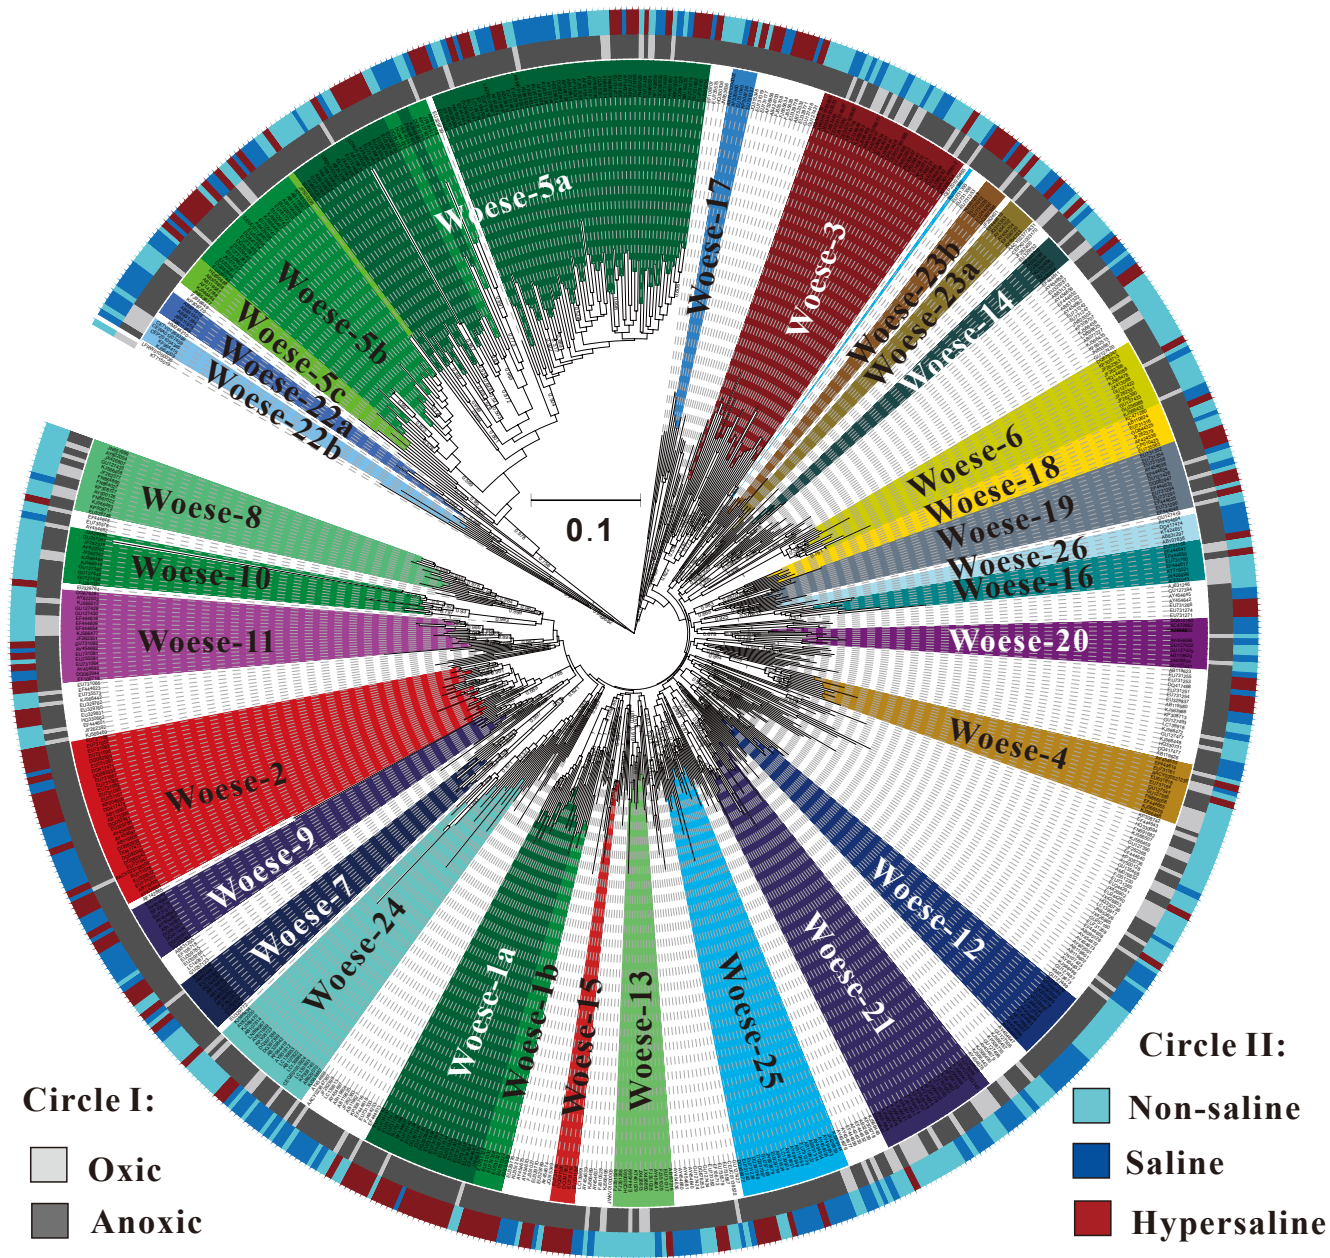

**Supplementary Figure 2 | Phylogeny of 26 proposed subgroups of Woesearchaeota inferred by Neighbor-Joining method.** The phylogenetic tree is based on 663 available 16S rRNA gene sequences from SILVA SSU 128 database dereplicated at a 97% cutoff. Subgroups from Woese-1 to Woese-26 are colored within the corresponding leaves in the tree. Uncolored leaves identify sequences not assigned to any subgroup (that is, ungrouped). Outer colored circles indicate sequence origin, as follows: circle I: anoxic (dark gray), oxidic (light gray); and circle II: Non-saline (ice blue), saline (sky blue), hypersaline (red). Tree was drawn using the web-based interactive tree of life. The full SSU rRNA gene tree is available in newick format as [Supplementary Dataset 2](#).

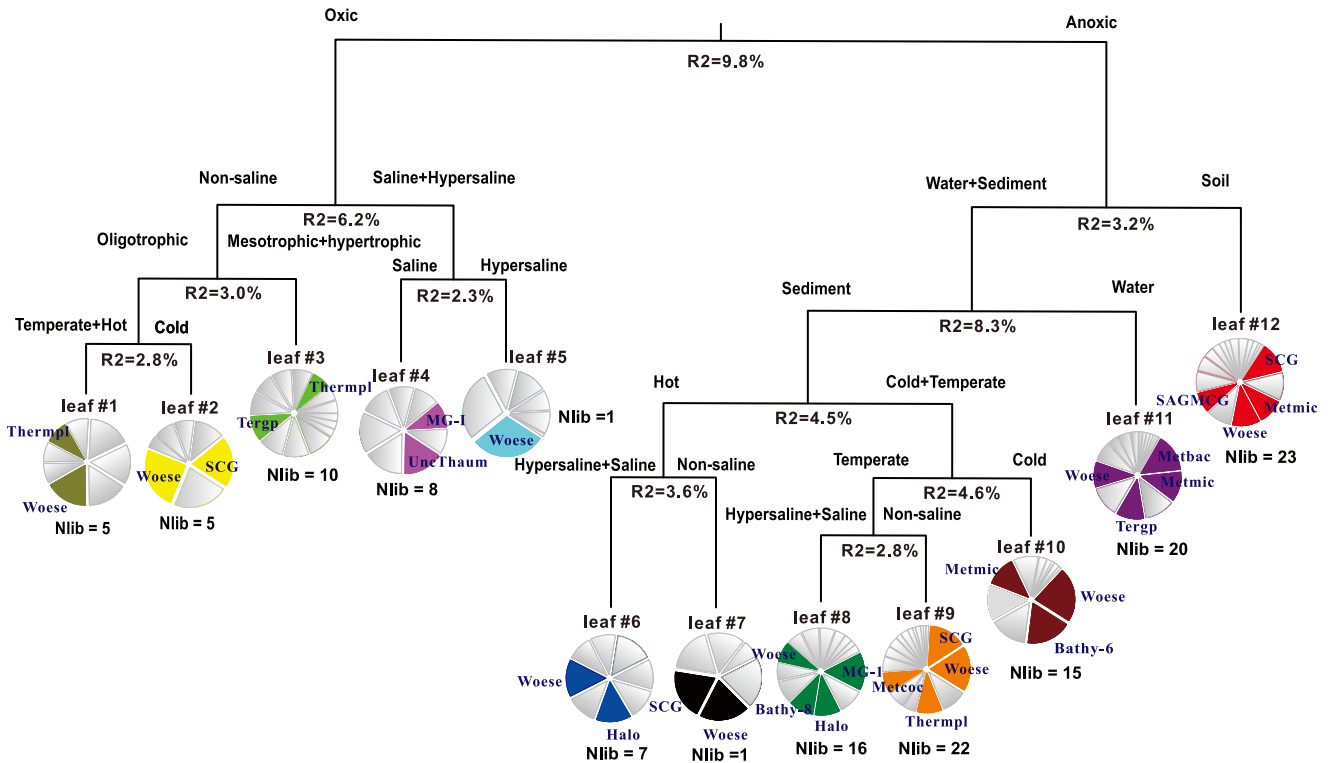

**Supplementary Figure 3 | Multivariate regression tree (MRT) analysis of the interaction between archaeal lineage abundance (in term of sequence number) and environmental parameters.** The model explained 51.1% of the variance in the whole data set (that is, 133 clone libraries/studies). Pies under each leaf represent the mean of normalized archaeal lineage abundance for each lineage significantly correlated with environmental parameters. Colored sections identify significant indicator lineages according to the IndVal index calculated on each leaf ( $P < 0.01$ ). “nlib” indicates number of clone libraries.

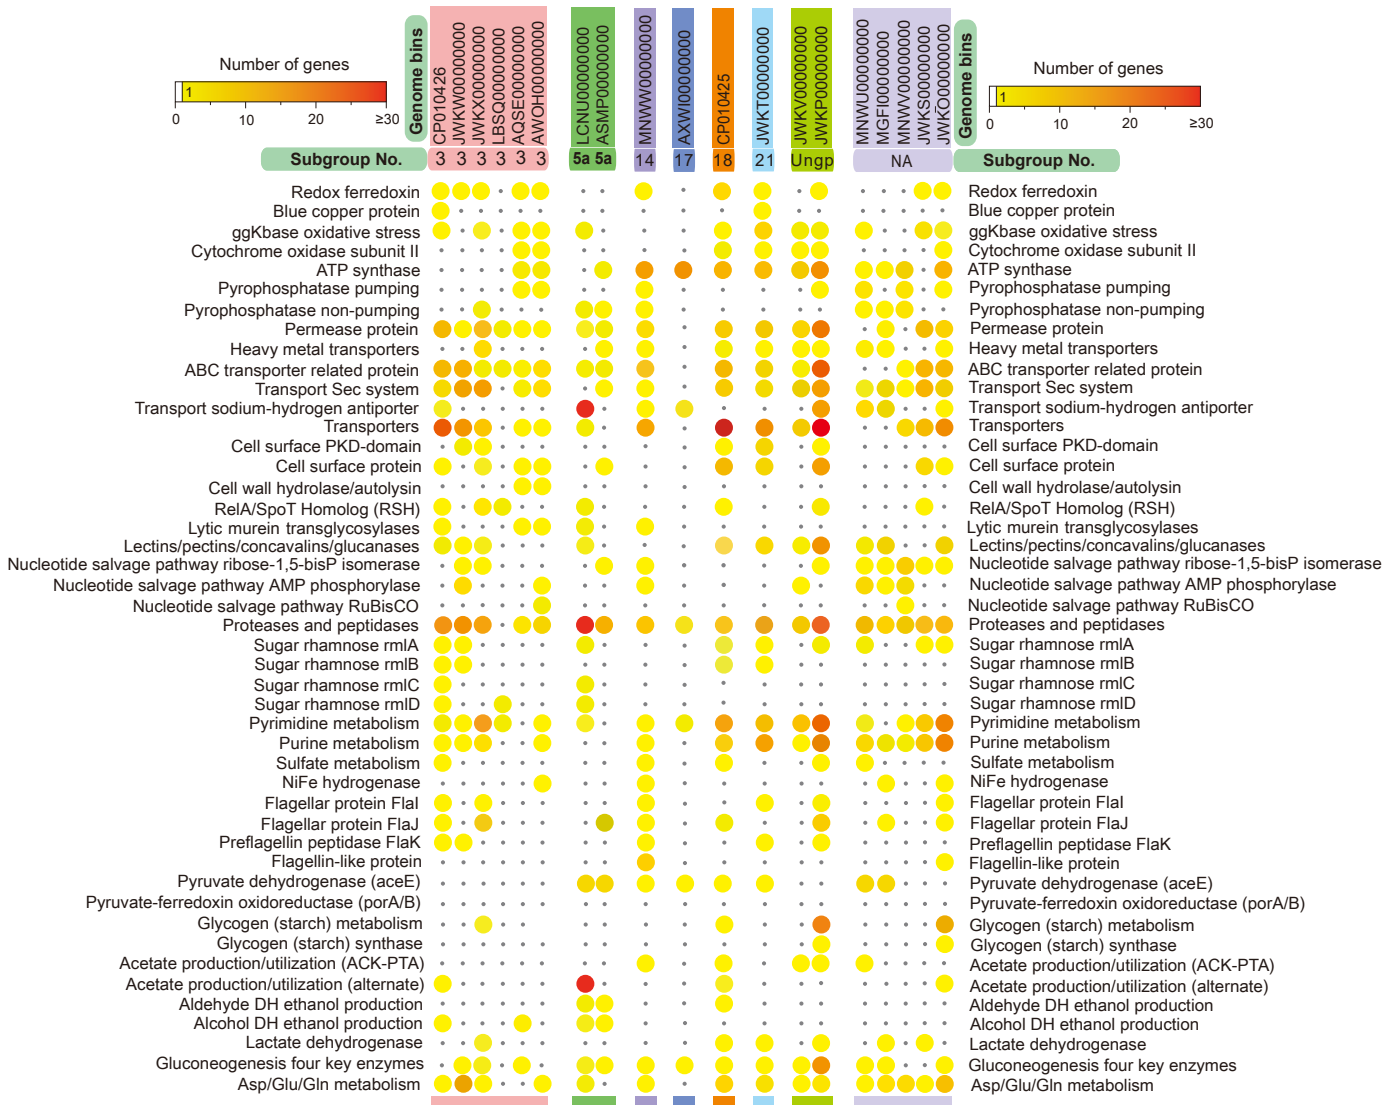

**Supplementary Figure 4 | Comparative metabolic analyses of the 19 Woesearchaeotal genome bins generated by blasting against the GenBank NCBI-nr database (Relevant to Figure 5).** Genes identified belong to proteins or enzymes putatively involved in electron transfer, oxidative stress, stringent response (RelA/SpoT, described in the main text), proteins involved in cell wall and cell surface biosynthesis, transporters and flagella components as well as purine and pyrimidine metabolisms. Numbers of genes per genome matching the annotation are represented by colors in circles. The lists are not mutually exclusive as a given protein can have more than one function or domain and was counted in each appropriate category. This annotation is mainly supported by [Supplementary Dataset 4](#).



## Supplementary Tables

**Supplementary Table 1** Summary of the 133 archaeal 16S rRNA gene libraries included in the analysis and the environmental matrix associated

| Environment | Library no. | Site location                              | Woese Seq. | Seq. <sup>6</sup> | OTU 97% | Study <sup>7</sup>               | Temp <sup>1</sup> | Ls <sup>2</sup> | Sal <sup>3</sup> | Ox <sup>4</sup> | Ts <sup>5</sup> |
|-------------|-------------|--------------------------------------------|------------|-------------------|---------|----------------------------------|-------------------|-----------------|------------------|-----------------|-----------------|
| Freshwater  | 1           | Gold mine, South Africa                    | 10         | 19                | 14      | unpublished                      | 1                 | 1               | 1                | 2               | 1               |
|             | 2           | Wastewater bioreactor, China               | 3          | 32                | 32      | unpublished                      | 2                 | 1               | 1                | 1               | 3               |
|             | 3           | Showerheads, USA                           | 6          | 14                | 12      | (Feazel <i>et al.</i> , 2009)    | 3                 | 1               | 1                | 1               | 1               |
|             | 4           | Phreatic sinkhole (cenote), Mexico         | 7          | 78                | 26      | (Sahl <i>et al.</i> , 2010)      | 1                 | 1               | 1                | 2               | 1               |
|             | 5           | Cold freshwater spring, Italy              | 31         | 95                | 19      | unpublished                      | 1                 | 1               | 1                | 1               | 1               |
|             | 6           | Lake Elementaita, Kenya                    | 18         | 40                | 26      | unpublished                      | 2                 | 1               | 1                | 1               | 2               |
|             | 7           | Groundwater, Japan                         | 2          | 70                | 66      | (Katsuyama <i>et al.</i> , 2013) | 1                 | 1               | 1                | 2               | 1               |
|             | 8           | Rybinsk reservoir, Russia                  | 25         | 48                | 48      | (Fedotova <i>et al.</i> , 2013)  | 2                 | 1               | 1                | 1               | 2               |
|             | 9           | Ilha Grande, South Atlantic                | 33         | 460               | 318     | (Silveira <i>et al.</i> , 2013)  | 1                 | 1               | 1                | 1               | 1               |
|             | 10          | Springwater in the foot of Mt. Fuji, Japan | 27         | 48                | 17      | (Segawa <i>et al.</i> , 2014)    | 1                 | 1               | 1                | 2               | 1               |
|             | 11          | Romashkinskoe petroleum reservoir, Russia  | 4          | 12                | 2       | (Nazina <i>et al.</i> , 2013)    | 2                 | 1               | 1                | 2               | 3               |
|             | 12          | Alpine lakes of Spanish Pyrenees, Spain    | 14         | 218               | 188     | (Auguet and Casamayor, 2013)     | 2                 | 1               | 1                | 1               | 1               |
|             | 13          | Lake Taihu, China                          | 15         | 101               | 79      | (Li <i>et al.</i> , 2015)        | 2                 | 1               | 1                | 1               | 3               |
|             | 14          | Lakes Dubrovskoye and Motykino, Russia     | 33         | 62                | 59      | (Fedotova <i>et al.</i> , 2012)  | 2                 | 1               | 1                | 1               | 1               |
|             | 15          | Cold spring, China                         | 34         | 47                | 12      | unpublished                      | 1                 | 1               | 1                | 2               | 1               |
|             | 16          | Well 3-18-34 of Shengli Oilfield, China    | 4          | 12                | 7       | (Mbadinga <i>et al.</i> , 2012)  | 3                 | 1               | 1                | 2               | 3               |
|             | 17          | Shengli Oilfield, China                    | 4          | 37                | 26      | (Zhou <i>et al.</i> , 2012)      | 3                 | 1               | 1                | 2               | 3               |
|             | 18          | Mackenzie River, Canada                    | 22         | 38                | 20      | (Galand <i>et al.</i> , 2008b)   | 2                 | 1               | 1                | 1               | 2               |
|             | 19          | Mackenzie River, Canada                    | 23         | 36                | 25      | (Galand <i>et al.</i> , 2008a)   | 2                 | 1               | 1                | 1               | 2               |
|             | 20          | Mackenzie River, Canada                    | 66         | 89                | 43      | (Galand <i>et al.</i> , 2006)    | 1                 | 1               | 1                | 1               | 2               |

|                            |    |                                                       |    |     |     |                                       |   |   |   |   |   |
|----------------------------|----|-------------------------------------------------------|----|-----|-----|---------------------------------------|---|---|---|---|---|
|                            | 21 | Eryuan Niujie hot spring, China                       | 3  | 17  | 2   | (Sun <i>et al.</i> , 2010)            | 3 | 1 | 1 | 1 | 1 |
|                            | 22 | Rio Tinto, Spain                                      | 79 | 620 | 585 | (Amaral-Zettler <i>et al.</i> , 2011) | 2 | 1 | 1 | 1 | 2 |
|                            | 23 | Deep horizons of the Severnyi site, Japan             | 5  | 12  | 4   | (Nazina <i>et al.</i> , 2010)         | 1 | 1 | 1 | 2 | 1 |
|                            | 24 | Minami-Kanto Gas Field, Japan                         | 6  | 29  | 13  | (Mochimaru <i>et al.</i> , 2007)      | 2 | 1 | 1 | 2 | 2 |
|                            | 25 | Tucuruí hydroelectric power station reservoir, Brazil | 39 | 182 | 150 | (Gracas <i>et al.</i> , 2011)         | 2 | 1 | 1 | 2 | 2 |
|                            | 26 | Lake Pontchartrain basin, USA                         | 10 | 10  | 9   | unpublished                           | 2 | 1 | 1 | 1 | 2 |
|                            | 27 | Geothermal springs, Greece                            | 33 | 74  | 6   | (Kormas <i>et al.</i> , 2009)         | 3 | 1 | 1 | 1 | 1 |
|                            | 28 | Cold sulfidic springs, Germany                        | 10 | 21  | 7   | (Rudolph <i>et al.</i> , 2004)        | 1 | 1 | 1 | 1 | 1 |
|                            | 29 | Alpine Lake Joeri XIII, Switzerland                   | 4  | 14  | 13  | unpublished                           | 1 | 1 | 1 | 1 | 1 |
|                            | 30 | Underground Crude Oil Storage Cavity, Japan           | 7  | 18  | 7   | (Watanabe <i>et al.</i> , 2002)       | 1 | 1 | 1 | 2 | 3 |
|                            | 31 | Pavilion Lake, Canada                                 | 22 | 53  | 53  | (Chan <i>et al.</i> , 2014)           | 1 | 2 | 1 | 1 | 2 |
|                            | 32 | Freshwater suboxic pond, France                       | 14 | 36  | 30  | (Bri e <i>et al.</i> , 2007)          | 2 | 2 | 1 | 2 | 3 |
|                            | 33 | Zveplenica karst spring, Slovenia                     | 57 | 183 | 175 | unpublished                           | 1 | 2 | 1 | 2 | 1 |
|                            | 34 | Poyang Lake, China                                    | 37 | 190 | 85  | (Kou <i>et al.</i> , 2016)            | 2 | 2 | 1 | 2 | 2 |
|                            | 35 | Zoige wetland in Tibetan plateau, China               | 90 | 288 | 269 | (Fu <i>et al.</i> , 2015)             | 1 | 2 | 1 | 2 | 2 |
|                            | 36 | Full-scale anaerobic digester plant, Japan            | 72 | 388 | 356 | (Niu <i>et al.</i> , 2015)            | 2 | 2 | 1 | 2 | 3 |
|                            | 37 | Red and moonmilk deposit on granite wall, Portugal    | 10 | 23  | 13  | unpublished                           | 1 | 2 | 1 | 1 | 1 |
| <b>Freshwater sediment</b> | 38 | Shanghai Oil Refinery, China                          | 4  | 11  | 7   | (Wang <i>et al.</i> , 2012)           | 2 | 2 | 1 | 2 | 2 |
|                            | 39 | Fen soil, Slovenia                                    | 63 | 82  | 76  | unpublished                           | 2 | 2 | 1 | 2 | 2 |
|                            | 40 | Lakes on the Tibetan Plateau, China                   | 21 | 71  | 40  | (Liu <i>et al.</i> , 2013)            | 1 | 2 | 1 | 2 | 2 |
|                            | 41 | Obukhovskoe bog, Russia                               | 17 | 43  | 41  | (Belova <i>et al.</i> , 2012)         | 2 | 2 | 1 | 2 | 2 |
|                            | 42 | Char Lake on Cornwallis Island, Canada                | 69 | 227 | 214 | (Stoeva <i>et al.</i> , 2014)         | 1 | 2 | 1 | 2 | 1 |
|                            | 43 | Small Lake Wetland on Cornwallis Island, Canada       | 57 | 190 | 180 | (Stoeva <i>et al.</i> , 2014)         | 1 | 2 | 1 | 2 | 1 |
|                            | 44 | Lake Kinneret, Israel                                 | 54 | 161 | 97  | (Bar-Or <i>et al.</i> , 2015)         | 2 | 2 | 1 | 2 | 2 |

|    |                                                       |     |     |     |                                        |   |   |   |   |   |
|----|-------------------------------------------------------|-----|-----|-----|----------------------------------------|---|---|---|---|---|
| 45 | Lake Taihu, China                                     | 35  | 150 | 111 | (Fan and Wu, 2014)                     | 2 | 2 | 1 | 2 | 3 |
| 46 | Lake Kivu, East Central Africa                        | 63  | 161 | 94  | (Bhattarai <i>et al.</i> , 2012)       | 2 | 2 | 1 | 2 | 2 |
| 47 | Wetland soil, Japan                                   | 10  | 36  | 15  | (Narihiro <i>et al.</i> , 2011)        | 2 | 2 | 1 | 2 | 2 |
| 48 | Lake Taihu, China                                     | 25  | 146 | 101 | (Fan and Wu, 2014)                     | 1 | 2 | 1 | 2 | 3 |
| 49 | Lake Taihu, China                                     | 10  | 90  | 60  | (Fan and Wu, 2014)                     | 2 | 2 | 1 | 2 | 3 |
| 50 | Lake Taihu, China                                     | 10  | 121 | 93  | (Fan and Wu, 2014)                     | 3 | 2 | 1 | 2 | 3 |
| 51 | Beijing Cuihu Wetland Park, China                     | 12  | 38  | 32  | (Liu <i>et al.</i> , 2015)             | 2 | 2 | 1 | 2 | 2 |
| 52 | Lake Geneva, Switzerland                              | 11  | 33  | 27  | (Haller <i>et al.</i> , 2011)          | 2 | 2 | 1 | 2 | 2 |
| 53 | Lake Llebre, Spain                                    | 94  | 97  | 35  | (Barberán <i>et al.</i> , 2011)        | 2 | 2 | 1 | 2 | 2 |
| 54 | Psychrophilic anaerobic reactor, China                | 7   | 49  | 37  | (Xing <i>et al.</i> , 2010)            | 1 | 2 | 1 | 2 | 2 |
| 55 | Slurry of biogas-reactor, China                       | 79  | 946 | 900 | unpublished                            | 2 | 2 | 1 | 2 | 2 |
| 56 | Lake Stechlin, Germany                                | 13  | 25  | 9   | (Conrad <i>et al.</i> , 2007)          | 2 | 2 | 1 | 2 | 1 |
| 57 | Lake Dagow, Germany                                   | 12  | 30  | 19  | (Chan <i>et al.</i> , 2005)            | 2 | 2 | 1 | 2 | 3 |
| 58 | Lake Wivenhoe, Australia                              | 9   | 78  | 41  | (Green <i>et al.</i> , 2012)           | 2 | 2 | 1 | 2 | 3 |
| 59 | Sediment microbial fuel cells, Germany                | 23  | 47  | 43  | (De Schampelaire <i>et al.</i> , 2010) | 2 | 2 | 1 | 2 | 2 |
| 60 | Drinking water reservoir, Germany                     | 68  | 323 | 230 | unpublished                            | 2 | 2 | 1 | 2 | 2 |
| 61 | Lake Batata and Lake Mussura, Germany                 | 5   | 86  | 67  | (Conrad <i>et al.</i> , 2010)          | 2 | 2 | 1 | 2 | 2 |
| 62 | Tucuruí hydroelectric power station reservoir, Brazil | 8   | 125 | 11  | (Gracas <i>et al.</i> , 2011)          | 2 | 2 | 1 | 2 | 2 |
| 63 | Agricultural fields, China                            | 48  | 171 | 93  | (Ge <i>et al.</i> , 2016)              | 2 | 3 | 1 | 2 | 2 |
| 64 | Paddy soil, China                                     | 108 | 456 | 407 | (Liu <i>et al.</i> , 2016a)            | 2 | 3 | 1 | 2 | 2 |
| 65 | Rice soil, Germany                                    | 10  | 115 | 102 | (Pump <i>et al.</i> , 2015)            | 2 | 3 | 1 | 2 | 2 |
| 66 | Qixing farmland in Sanjiang Plain, China              | 5   | 57  | 55  | (Lu <i>et al.</i> , 2015)              | 2 | 3 | 1 | 2 | 2 |
| 67 | Paddy soil, China                                     | 84  | 257 | 222 | unpublished                            | 2 | 3 | 1 | 2 | 2 |
| 68 | Paddy soil, China                                     | 25  | 243 | 212 | (Lin and Lu, 2015)                     | 2 | 3 | 1 | 2 | 2 |

|      |    |                                            |     |     |     |                                   |   |   |   |   |   |
|------|----|--------------------------------------------|-----|-----|-----|-----------------------------------|---|---|---|---|---|
| Soil | 69 | Appalachian peatland soil, USA             | 23  | 82  | 41  | (Hawkins, 2013)                   | 2 | 3 | 1 | 2 | 2 |
|      | 70 | Paddy soil, China                          | 26  | 282 | 272 | (Liu <i>et al.</i> , 2016b)       | 2 | 3 | 1 | 2 | 2 |
|      | 71 | Three Gorges Reservoir Region, China       | 3   | 13  | 10  | unpublished                       | 2 | 3 | 1 | 2 | 2 |
|      | 72 | Rice paddy field, Japan                    | 3   | 21  | 13  | (Liu <i>et al.</i> , 2012)        | 2 | 3 | 1 | 2 | 2 |
|      | 73 | Damma glacier forefield, Switzerland       | 17  | 120 | 93  | (Zumsteg <i>et al.</i> , 2012)    | 1 | 3 | 1 | 2 | 2 |
|      | 74 | Upper Tennessee River Basin, USA           | 22  | 26  | 13  | (Carmichael <i>et al.</i> , 2013) | 1 | 3 | 1 | 2 | 1 |
|      | 75 | High-Arctic active permafrost soil, Canada | 28  | 121 | 118 | (Wilhelm <i>et al.</i> , 2011)    | 1 | 3 | 1 | 2 | 2 |
|      | 76 | Rice field soil, China                     | 4   | 41  | 37  | (Ma and Lu, 2011)                 | 2 | 3 | 1 | 2 | 2 |
|      | 77 | Jidong Oilfield, China                     | 11  | 26  | 7   | (Liu <i>et al.</i> , 2009)        | 2 | 3 | 1 | 2 | 3 |
|      | 78 | Paddy soil, China                          | 15  | 47  | 35  | (Wu <i>et al.</i> , 2009)         | 2 | 3 | 1 | 2 | 2 |
|      | 79 | Upland Rice Field Soil, Japan              | 7   | 87  | 80  | (Nishizawa <i>et al.</i> , 2008)  | 2 | 3 | 1 | 2 | 2 |
|      | 80 | Rice field soil, Italy                     | 48  | 164 | 150 | (Conrad <i>et al.</i> , 2008)     | 2 | 3 | 1 | 2 | 2 |
|      | 81 | High arctic permafrost peat, Norway        | 26  | 64  | 56  | (Høj <i>et al.</i> , 2008)        | 1 | 3 | 1 | 2 | 2 |
|      | 82 | Rice field soil, Italy                     | 8   | 23  | 23  | (Penning and Conrad, 2006)        | 2 | 3 | 1 | 2 | 2 |
|      | 83 | Paddy soil, Japan                          | 55  | 98  | 94  | unpublished                       | 2 | 3 | 1 | 2 | 2 |
|      | 84 | Paddy soil, Japan                          | 6   | 18  | 17  | unpublished                       | 2 | 3 | 1 | 2 | 2 |
|      | 85 | Northeastern Gulf of Mexico, USA           | 105 | 310 | 90  | (Moss <i>et al.</i> , 2015)       | 1 | 2 | 2 | 2 | 2 |
|      | 86 | South China Sea, China                     | 6   | 41  | 10  | unpublished                       | 1 | 2 | 2 | 2 | 2 |
|      | 87 | Western Pacific, Japan                     | 12  | 233 | 214 | unpublished                       | 1 | 2 | 2 | 2 | 2 |
|      | 88 | Maizuru Bay, Japan                         | 7   | 26  | 6   | unpublished                       | 2 | 2 | 2 | 1 | 2 |
|      | 89 | The Pacific Ocean                          | 14  | 185 | 179 | (Wu <i>et al.</i> , 2013)         | 1 | 2 | 2 | 2 | 2 |
|      | 90 | The Pacific Ocean                          | 38  | 222 | 206 | (Wu <i>et al.</i> , 2013)         | 1 | 2 | 2 | 2 | 2 |
|      | 91 | Nankai Trough, Japan                       | 9   | 74  | 21  | (Aoki <i>et al.</i> , 2014)       | 1 | 2 | 2 | 2 | 2 |
|      | 92 | Shimizu port, Japan                        | 3   | 40  | 9   | unpublished                       | 2 | 2 | 2 | 2 | 2 |

|                                |                                |                                                       |     |     |                                |                                   |   |   |   |   |   |
|--------------------------------|--------------------------------|-------------------------------------------------------|-----|-----|--------------------------------|-----------------------------------|---|---|---|---|---|
| <b>Marine sediment</b>         | 93                             | The Pacific Ocean                                     | 64  | 132 | 59                             | (Fagervold <i>et al.</i> , 2012)  | 1 | 2 | 2 | 1 | 2 |
|                                | 94                             | Xiangshan Bay, China                                  | 8   | 47  | 16                             | (Qiu <i>et al.</i> , 2013)        | 2 | 2 | 2 | 2 | 2 |
|                                | 95                             | Marmara Sea, Turkey                                   | 41  | 141 | 29                             | (Kolukirik <i>et al.</i> , 2011)  | 2 | 2 | 2 | 2 | 2 |
|                                | 96                             | Seawater-processing wastewater treatment plant, Spain | 63  | 117 | 106                            | (Sánchez <i>et al.</i> , 2011)    | 2 | 2 | 2 | 2 | 3 |
|                                | 97                             | Chesapeake Bay, USA                                   | 6   | 78  | 77                             | (Breuker <i>et al.</i> , 2011)    | 1 | 2 | 2 | 2 | 1 |
|                                | 98                             | Shark Bay, Western Australia                          | 13  | 47  | 33                             | (Papineau <i>et al.</i> , 2005)   | 2 | 2 | 2 | 1 | 2 |
|                                | 99                             | Santos-Sao Vicente estuary, Brazil                    | 31  | 118 | 87                             | unpublished                       | 2 | 2 | 2 | 2 | 2 |
|                                | 100                            | Santos-Sao Vicente estuary, Brazil                    | 35  | 107 | 66                             | unpublished                       | 2 | 2 | 2 | 2 | 2 |
|                                | 101                            | The Mouth of Orikasa River, Japan                     | 35  | 52  | 12                             | (Kaku <i>et al.</i> , 2005)       | 2 | 2 | 2 | 2 | 2 |
|                                | 102                            | West Pacific warm pool                                | 7   | 14  | 4                              | (Wang <i>et al.</i> , 2005)       | 3 | 2 | 2 | 2 | 2 |
| 103                            | Tokyo Bay, Japan               | 4                                                     | 20  | 10  | unpublished                    | 2                                 | 2 | 2 | 2 | 2 |   |
| <b>Marine water column</b>     | 104                            | Coastal Lake A of Ellesmere Island, Canada            | 76  | 89  | 55                             | (Pouliot <i>et al.</i> , 2009)    | 1 | 1 | 2 | 1 | 2 |
|                                | 105                            | Guanabara Bay, Brazil                                 | 14  | 188 | 130                            | (Turque <i>et al.</i> , 2010)     | 2 | 1 | 2 | 1 | 2 |
|                                | 106                            | Northeastern Gulf of Mexico, USA                      | 15  | 107 | 41                             | (Moss <i>et al.</i> , 2015)       | 1 | 1 | 2 | 2 | 2 |
|                                | 107                            | Blanes Bay Microbial Observatory, Spain               | 24  | 234 | 223                            | (Galand <i>et al.</i> , 2010)     | 2 | 1 | 2 | 1 | 2 |
|                                | 108                            | Lake Mackenzie, Canada                                | 16  | 40  | 32                             | (Galand <i>et al.</i> , 2008a)    | 1 | 1 | 2 | 1 | 2 |
|                                | 109                            | Lake Mackenzie, Canada                                | 29  | 56  | 37                             | (Galand <i>et al.</i> , 2008b)    | 1 | 1 | 2 | 1 | 2 |
|                                | 110                            | Coastal Arctic Ocean                                  | 13  | 35  | 23                             | (Galand <i>et al.</i> , 2006)     | 1 | 1 | 2 | 1 | 2 |
|                                | 111                            | Guerrero Negro (GN), Mexico                           | 227 | 917 | 807                            | (Robertson <i>et al.</i> , 2009)  | 2 | 2 | 3 | 2 | 2 |
| 112                            | Cariboo Plateau, Canada        | 11                                                    | 18  | 8   | unpublished                    | 1                                 | 2 | 3 | 2 | 2 |   |
| 113                            | Sea port of Zeebrugge, Belgium | 24                                                    | 87  | 58  | (Siegert <i>et al.</i> , 2011) | 2                                 | 2 | 3 | 2 | 2 |   |
| <b>Hypersaline environment</b> | 114                            | Araruama Lagoon, Brazil                               | 43  | 63  | 30                             | (Clementino <i>et al.</i> , 2008) | 3 | 1 | 3 | 2 | 2 |
|                                | 115                            | Barn Island, USA                                      | 4   | 190 | 170                            | (Nelson <i>et al.</i> , 2009)     | 2 | 2 | 3 | 2 | 2 |



|                          |     |                                                                |    |     |     |                                          |   |   |   |   |   |
|--------------------------|-----|----------------------------------------------------------------|----|-----|-----|------------------------------------------|---|---|---|---|---|
|                          | 116 | Saline soil, China                                             | 11 | 48  | 32  | unpublished                              | 2 | 3 | 3 | 2 | 2 |
|                          | 117 | Salton Sea, USA                                                | 34 | 77  | 9   | (Swan <i>et al.</i> , 2010)              | 2 | 2 | 3 | 2 | 2 |
|                          | 118 | Guerrero Negro, Mexico                                         | 17 | 99  | 63  | (Sahl <i>et al.</i> , 2008)              | 2 | 2 | 3 | 2 | 2 |
|                          | 119 | Hypersaline lake of Salt Pan, Bahamas                          | 16 | 49  | 23  | (Baumgartner <i>et al.</i> , 2009)       | 2 | 2 | 3 | 2 | 2 |
|                          | 120 | Guerrero Negro, Mexico                                         | 14 | 61  | 55  | (Ley <i>et al.</i> , 2006)               | 2 | 2 | 3 | 2 | 2 |
|                          | 121 | Discovery Basin, Mediterranean Seafloor                        | 2  | 25  | 25  | (Hallsworth <i>et al.</i> , 2007)        | 2 | 2 | 3 | 2 | 2 |
|                          | 122 | Kagoshima Bay, Western Pacific Ocean                           | 6  | 14  | 5   | (Kimura <i>et al.</i> , 2010)            | 3 | 1 | 2 | 2 | 2 |
|                          | 123 | Suiyo Seamount and Myojin Knoll, Japan                         | 33 | 91  | 26  | (Takai and Horikoshi, 1999)              | 3 | 2 | 2 | 2 | 2 |
|                          | 124 | Suiyo Seamount, Japan                                          | 54 | 160 | 117 | (Kato <i>et al.</i> , 2012)              | 3 | 1 | 2 | 2 | 2 |
|                          | 125 | Hatoma Knoll, Japan                                            | 40 | 97  | 57  | (Yoshida-Takashima <i>et al.</i> , 2012) | 3 | 2 | 2 | 2 | 2 |
|                          | 126 | Inflated Plain and West Thumb regions of Yellowstone Lake, USA | 52 | 200 | 192 | (Kan <i>et al.</i> , 2011)               | 3 | 1 | 1 | 2 | 2 |
| <b>Hydrothermal vent</b> | 127 | East Pacific Rise                                              | 20 | 51  | 36  | (Moussard <i>et al.</i> , 2006)          | 3 | 2 | 2 | 2 | 2 |
|                          | 128 | Southern Mariana Trough                                        | 10 | 61  | 36  | (Kato <i>et al.</i> , 2010)              | 3 | 2 | 2 | 2 | 2 |
|                          | 129 | Lau Basin                                                      | 17 | 175 | 158 | (Pagé <i>et al.</i> , 2008)              | 3 | 1 | 2 | 2 | 2 |
|                          | 130 | Ridge Flank Abyssal Hills sea floor                            | 8  | 28  | 15  | (Ehrhardt <i>et al.</i> , 2007)          | 3 | 2 | 2 | 2 | 2 |
|                          | 131 | Southern Mariana Trough                                        | 8  | 80  | 45  | (Kato <i>et al.</i> , 2009)              | 3 | 2 | 2 | 2 | 2 |
|                          | 132 | North and Central Big Chimney                                  | 3  | 40  | 23  | (Nakagawa <i>et al.</i> , 2005a)         | 3 | 1 | 2 | 2 | 2 |
|                          | 133 | North Big Chimney, Mid-Okinawa Trough                          | 2  | 16  | 12  | (Nakagawa <i>et al.</i> , 2005b)         | 3 | 1 | 2 | 2 | 2 |

Note: Environmental parameters were defined mainly by referring to the corresponding literatures if any. For oxic status, oxic habitats mainly refer to surface water or sediments whereas anoxic environments mainly refer to groundwater, deep sediments or water, soil, hydrothermal vents if the corresponding literature was unpublished.

1. Temperature: 1 = cold (<15 °C), 2 = temperate (15~30 °C), 3 = hot (>30 °C);
2. Life style: 1 = water, 2 = sediment, 3 = soil;
3. Salinity: 1 = non-saline, 2 = saline, 3 = hypersaline;
4. Oxic status: 1 = oxic, 2 = anoxic;

5. Trophic state: 1 = oligotrophic, 2 = mesotrophic, 3 = hypertrophic.
6. Libraries or studies with less than 10 archaeal 16S rRNA gene sequences were discarded from this summary.
7. Unpublished indicates direct submissions to GenBank without any published paper related.

**Supplementary Table 2** Summary of the 19 genomes of Woesearchaeota

| <b>Genome ID<sup>1</sup></b> | <b>16S rRNA gene ID<sup>2</sup></b> | <b>Subgroup</b> | <b>Source</b>    | <b>Completeness (%)</b> | <b>Sequencing Depth (x)</b> | <b>Relative GC Content (%)</b> | <b>Number of Protein Coding Genes</b> | <b>Reference</b>                |
|------------------------------|-------------------------------------|-----------------|------------------|-------------------------|-----------------------------|--------------------------------|---------------------------------------|---------------------------------|
| CP010426                     | CP010426                            | Woese-3         | Groundwater      | 100                     | 20                          | 32                             | 1015                                  | (Castelle <i>et al.</i> , 2015) |
| JWKW00000000                 | JWKW01000011                        | Woese-3         | Groundwater      | 78                      | 70                          | 34                             | 796                                   | (Castelle <i>et al.</i> , 2015) |
| JWKX00000000                 | JWKX01000012                        | Woese-3         | Groundwater      | 87                      | 20                          | 30                             | 1047                                  | (Castelle <i>et al.</i> , 2015) |
| LBSQ00000000                 | LBSQ01000033                        | Woese-3         | Aquifer sediment | 50                      | 9.83                        | 37                             | 833                                   | (Brown <i>et al.</i> , 2015)    |
| AQSE00000000                 | AQSE01000048                        | Woese-3         | Freshwater       | 42                      | NA <sup>3</sup>             | 35                             | 984                                   | (Rinke <i>et al.</i> , 2013)    |
| AWOH00000000                 | AWOH01000005                        | Woese-3         | Freshwater       | 42                      | 30                          | 32                             | 656                                   | (Rinke <i>et al.</i> , 2013)    |
| LCNU00000000                 | LCNU01000021                        | Woese-5a        | Aquifer sediment | 50                      | 15.58                       | 47                             | 1033                                  | (Brown <i>et al.</i> , 2015)    |
| ASMP00000000                 | ASMP01000002                        | Woese-5a        | Freshwater       | 57                      | NA                          | 37                             | 1124                                  | (Rinke <i>et al.</i> , 2013)    |
| MNWW00000000                 | KP308710                            | Woese-14        | Groundwater      | 50                      | 10                          | 57                             | 1475                                  | (Probst <i>et al.</i> , 2017)   |
| AXWI00000000                 | AXWI01000002                        | Woese-17        | Freshwater       | 16                      | NA                          | 27                             | 462                                   | Unpublished                     |
| CP010425                     | CP010425                            | Woese-18        | Groundwater      | 100                     | 15                          | 43                             | 1309                                  | (Castelle <i>et al.</i> , 2015) |
| JWKT00000000                 | JWKT01000043                        | Woese-21        | Groundwater      | 76                      | 112                         | 56                             | 1008                                  | (Castelle <i>et al.</i> , 2015) |
| JWKV00000000                 | JWKV01000003                        | UngpWoese       | Groundwater      | 61                      | 14                          | 43                             | 425                                   | (Castelle <i>et al.</i> , 2015) |
| JWKP00000000                 | KP308716                            | UngpWoese       | Groundwater      | 76                      | 18                          | 44.8                           | 1243                                  | (Castelle <i>et al.</i> , 2015) |

|               |    |    |             |    |    |      |      |                                     |
|---------------|----|----|-------------|----|----|------|------|-------------------------------------|
| MGFI00000000  | NA | NA | Sediment    | 50 | 10 | 34   | 528  | (Anantharaman <i>et al.</i> , 2016) |
| MN WV00000000 | NA | NA | Groundwater | 50 | 10 | 47   | 916  | (Probst <i>et al.</i> , 2017)       |
| MN WU00000000 | NA | NA | Groundwater | 50 | 10 | 33   | 1041 | (Probst <i>et al.</i> , 2017)       |
| JWKS00000000  | NA | NA | Groundwater | 76 | 12 | 42   | 577  | (Castelle <i>et al.</i> , 2015)     |
| JWKO00000000  | NA | NA | Groundwater | 63 | 11 | 44.6 | 996  | (Castelle <i>et al.</i> , 2015)     |

- Note: 1. Genome IDs referred to the accession numbers of GenBank in NCBI;  
2. 16S rRNA gene IDs referred to the accession numbers in SILVA SSU\_128 Dataset;  
3. NA indicates the relevant information is not available.

**Supplementary Table 3** Values of network indices and taxonomy for the first 10 nodes of each index

| <b>Lineage</b> | <b>Closeness centrality</b> | <b>Lineage</b> | <b>Betweenness centrality</b> | <b>Lineage</b> | <b>Degree</b> |
|----------------|-----------------------------|----------------|-------------------------------|----------------|---------------|
| Woese          | 0.36                        | Woese          | 0.36                          | Woese          | 24            |
| Woese          | 0.35                        | Woese          | 0.35                          | Woese          | 24            |
| Woese          | 0.35                        | Metmic         | 0.33                          | Woese          | 22            |
| Metmic         | 0.33                        | Bathy-6        | 0.28                          | Metmic         | 22            |
| Woese          | 0.32                        | Metbac         | 0.25                          | Metbac         | 18            |
| Metbac         | 0.32                        | Thermpl        | 0.25                          | Bathy-6        | 18            |
| Metmic         | 0.3                         | Metmic         | 0.18                          | Thermpl        | 16            |
| Woese          | 0.29                        | SCG            | 0.12                          | Woese          | 14            |
| Bathy-6        | 0.28                        | Woese          | 0.08                          | pCIRA 13       | 12            |
| Thermpl        | 0.27                        | Woese          | 0.08                          | SAGMCG         | 12            |

Abbreviations: Woese, Woese archaeota; Metmic, Methanomicrobia; Metbac, Methanobacteria; Bathy-6, Bathyarchaeota subgroup-6; Thermpl, Thermoplasmata; SCG, Soil Crenarchaeotic Group; SAGMCG, South African Gold Mine Group 1.



**Supplementary Table 4** Coverage and similarity of 26 subgroups of Woese archaeota

| <b>Subgroup</b>     | <b>Minimum Intra-group Similarity (%)<sup>1</sup></b> | <b>Coverage of Sequence<sup>2</sup></b> |
|---------------------|-------------------------------------------------------|-----------------------------------------|
| Woese-1a            | 84                                                    | 58                                      |
| Woese-1b            | 83                                                    | 9                                       |
| Woese-2             | 86                                                    | 117                                     |
| Woese-3             | 80                                                    | 150                                     |
| Woese-4             | 84                                                    | 67                                      |
| Woese-5a            | 80                                                    | 918                                     |
| Woese-5b            | 80                                                    | 415                                     |
| Woese-5c            | 80                                                    | 31                                      |
| Woese-6             | 90                                                    | 153                                     |
| Woese-7             | 80                                                    | 53                                      |
| Woese-8             | 84                                                    | 101                                     |
| Woese-9             | 90                                                    | 31                                      |
| Woese-10            | 87                                                    | 53                                      |
| Woese-11            | 84                                                    | 83                                      |
| Woese-12            | 82                                                    | 65                                      |
| Woese-13            | 81                                                    | 26                                      |
| Woese-14            | 85                                                    | 27                                      |
| Woese-15            | 92                                                    | 72                                      |
| Woese-16            | 86                                                    | 28                                      |
| Woese-17            | 89                                                    | 18                                      |
| Woese-18            | 88                                                    | 23                                      |
| Woese-19            | 85                                                    | 32                                      |
| Woese-20            | 85                                                    | 50                                      |
| Woese-21            | 80                                                    | 115                                     |
| Woese-22a           | 87                                                    | 8                                       |
| Woese-22b           | 80                                                    | 24                                      |
| Woese-23a           | 84                                                    | 14                                      |
| Woese-23b           | 84                                                    | 26                                      |
| Woese-24            | 80                                                    | 148                                     |
| Woese-25            | 80                                                    | 67                                      |
| Woese-26            | 82                                                    | 10                                      |
| Woese-1 to Woese-26 | 75                                                    | 2992                                    |
| Ungrouped Woese     | ND <sup>3</sup>                                       | 592                                     |

Note: 1. Minimum intra-group similarity represents the minimum similarity between any sequences within the individual group;

2. Coverage of sequences indicates the number of 16S rRNA gene sequences (>600bp) assigned into the corresponding group with the similarity to the closest sequence in the tree above the minimum intra-group similarity;
3. ND is the abbreviation of “not determined”.

**Supplementary Table 5** Occurrence of archaeal lineages across the 133 libraries/studies

| <b>Archaeal lineage (class level)</b>                        | <b>Abbreviation</b> | <b>Mean relative abundance</b> | <b>Occurrence</b> |
|--------------------------------------------------------------|---------------------|--------------------------------|-------------------|
| Aenigmarchaeota; Aenigmarchaeota Incertae Sedis              | AIS                 | 0.07                           | 1                 |
| Bathyarchaeota; Bathy-17                                     | Bathy-17            | 0.11                           | 3                 |
| Euryarchaeota; Archaeoglobi                                  | Archglo             | 0.11                           | 3                 |
| Korarchaeota; Korarchaeota Incertae Sedis                    | KorIS               | 0.13                           | 3                 |
| Marine Hydrothermal Vent Group(MHVG); uncultured archaeon    | UncMHVG             | 0.13                           | 3                 |
| Euryarchaeota; Thermococci                                   | Thermcoc            | 0.17                           | 3                 |
| Bathyarchaeota; Bathy-11                                     | Bathy-11            | 0.05                           | 4                 |
| Euryarchaeota; Methanococci                                  | Metcoc              | 0.16                           | 4                 |
| Bathyarchaeota; Bathy-8                                      | Bathy-8             | 0.18                           | 5                 |
| Euryarchaeota; Halobacteria                                  | Halo                | 0.38                           | 5                 |
| Thaumarchaeota; uncultured archaeon                          | UncThaum            | 0.13                           | 6                 |
| Crenarchaeota; Thermoprotei                                  | Thermpro            | 0.13                           | 6                 |
| Bathyarchaeota; Bathy-5b                                     | Bathy-5b            | 0.15                           | 6                 |
| Bathyarchaeota; Bathy-15/C3                                  | Bathy-15            | 0.10                           | 7                 |
| Thaumarchaeota; South African Gold Mine Gp 1(SAGMCG-1)       | SAGMCG              | 0.13                           | 7                 |
| Thaumarchaeota; Marine Benthic Group B                       | MBG-B               | 0.14                           | 8                 |
| Thaumarchaeota; Marine Benthic Group A                       | MBG-A               | 0.03                           | 10                |
| Parvarchaeota; Parvarchaeota Incertae Sedis                  | ParvIS              | 0.03                           | 11                |
| Bathyarchaeota; Bathy-14                                     | Bathy-14            | 0.15                           | 11                |
| Bathyarchaeota; Bathy-1                                      | Bathy-1             | 0.07                           | 12                |
| Bathyarchaeota; Bathy-12                                     | Bathy-12            | 0.08                           | 12                |
| Thaumarchaeota; AK31                                         | AK31                | 0.09                           | 12                |
| Aigarchaeota; Terrestrial Hot Spring Gp (THSCG)              | THSG                | 0.09                           | 12                |
| Thaumarchaeota; AK56                                         | AK56                | 0.03                           | 14                |
| Miscellaneous Euryarchaeotic Group(MEG); uncultured archaeon | UncMEG              | 0.17                           | 14                |
| Thaumarchaeota; AK59                                         | AK59                | 0.06                           | 15                |
| SM1K20; groundwater metagenome                               | SM1K20              | 0.05                           | 17                |
| Bathyarchaeota; Bathy-16                                     | Bathy-16            | 0.13                           | 21                |
| pCIRA-13; uncultured archaeon                                | pCIRA-13            | 0.13                           | 21                |
| Aenigmarchaeota; Deep Sea Euryarchaeotic Group(DSEG)         | DSEG                | 0.07                           | 22                |
| Thaumarchaeota; AS48                                         | AS48                | 0.13                           | 22                |
| Bathyarchaeota; Bathy-10                                     | Bathy-10            | 0.13                           | 31                |
| Thaumarchaeota; Terrestrial group                            | Tergp               | 0.12                           | 34                |
| Thaumarchaeota; Marine Group I                               | MG-I                | 0.17                           | 41                |
| Bathyarchaeota; Bathy-6                                      | Bathy-6             | 0.12                           | 90                |
| Euryarchaeota; Thermoplasmata                                | Thermpl             | 0.18                           | 96                |
| Thaumarchaeota; Soil Crenarchaeotic Group(SCG)               | SCG                 | 0.13                           | 100               |

|                                |        |      |     |
|--------------------------------|--------|------|-----|
| Euryarchaeota; Methanobacteria | Metbac | 0.16 | 106 |
| Euryarchaeota; Methanomicrobia | Metmic | 0.20 | 112 |
| Woese archaeota                | Woese  | 0.25 | 133 |

---

## Supplementary references

Amaral-Zettler LA, Zettler ER, Theroux SM, Palacios C, Aguilera A, Amils R. (2011). Microbial community structure across the tree of life in the extreme Rio Tinto. *ISME J* **5**: 42-50.

Anantharaman K, Brown CT, Hug LA, Sharon I, Castelle CJ, Probst AJ *et al.* (2016). Thousands of microbial genomes shed light on interconnected biogeochemical processes in an aquifer system. *Nat Commun* **7**.

Aoki M, Ehara M, Saito Y, Yoshioka H, Miyazaki M, Saito Y *et al.* (2014). A long-term cultivation of an anaerobic methane-oxidizing microbial community from deep-sea methane-seep sediment using a continuous-flow bioreactor. *PLoS One* **9**: e105356.

Auguet JC, Casamayor EO. (2013). Partitioning of Thaumarchaeota populations along environmental gradients in high mountain lakes. *FEMS Microbiol Ecol* **84**: 154-164.

Bar-Or I, Ben-Dov E, Kushmaro A, Eckert W, Sivan O. (2015). Methane-related changes in prokaryotes along geochemical profiles in sediments of Lake Kinneret (Israel). *Biogeosciences* **12**: 2847-2860.

Barberán A, FERNÁNDEZ-GUERRA A, AUGUET JC, Galand PE, Casamayor EO. (2011). Phylogenetic ecology of widespread uncultured clades of the Kingdom Euryarchaeota. *Mol Ecol* **20**: 1988-1996.

Baumgartner LK, Dupraz C, Buckley DH, Spear JR, Pace NR, Visscher PT. (2009). Microbial species richness and metabolic activities in hypersaline microbial mats: insight into biosignature formation through lithification. *Astrobiology* **9**: 861-874.

Belova S, Fedotova A, Dedysh S. (2012). Prokaryotic ultramicroforms in a Sphagnum peat bog of upper Volga catchment. *Microbiology* **81**: 614-620.

Bhattarai S, Ross KA, Schmid M, Anselmetti FS, Bürgmann H. (2012). Local conditions structure unique archaeal communities in the anoxic sediments of meromictic Lake Kivu. *Microb Ecol* **64**: 291-310.

- Breuker A, Köweker G, Blazejak A, Schippers A. (2011). The deep biosphere in terrestrial sediments in the Chesapeake Bay area, Virginia, USA.
- Bri e C, Moreira D, L pez-Garc a P. (2007). Archaeal and bacterial community composition of sediment and plankton from a suboxic freshwater pond. *Res Microbiol* **158**: 213-227.
- Brown CT, Hug LA, Thomas BC, Sharon I, Castelle CJ, Singh A *et al.* (2015). Unusual biology across a group comprising more than 15% of domain Bacteria. *Nature* **523**: 208-U173.
- Carmichael MJ, Carmichael SK, Santelli CM, Strom A, Br uer SL. (2013). Mn (II)-oxidizing bacteria are abundant and environmentally relevant members of ferromanganese deposits in caves of the upper Tennessee River Basin. *Geomicrobiol J* **30**: 779-800.
- Castelle CJ, Wrighton KC, Thomas BC, Hug LA, Brown CT, Wilkins MJ *et al.* (2015). Genomic expansion of domain archaea highlights roles for organisms from new phyla in anaerobic carbon cycling. *Curr Biol* **25**: 690-701.
- Chan OC, Claus P, Casper P, Ulrich A, Lueders T, Conrad R. (2005). Vertical distribution of structure and function of the methanogenic archaeal community in Lake Dagow sediment. *Environ Microbiol* **7**: 1139-1149.
- Chan OW, Bugler-Lacap DC, Biddle JF, Lim DS, McKay CP, Pointing SB. (2014). Phylogenetic diversity of a microbialite reef in a cold alkaline freshwater lake. *Can J Microbiol* **60**: 391-398.
- Clementino M, Vieira RP, Cardoso AM, Nascimento APAd, Silveira CBd, Riva TC *et al.* (2008). Prokaryotic diversity in one of the largest hypersaline coastal lagoons in the world. *Extremophiles* **12**: 595-604.
- Conrad R, Chan O, Claus P, Casper P. (2007). Characterization of methanogenic Archaea and stable isotope fractionation during methane production in the profundal sediment of an oligotrophic lake (Lake Stechlin, Germany). *Limnol Oceanogr* **52**: 1393.
- Conrad R, Klose M, Noll M, Kemnitz D, Bodelier PL. (2008). Soil type links microbial colonization of rice roots to methane emission. *Glob Chang Biol* **14**: 657-669.



Conrad R, Klose M, Claus P, Enrich-Prast A. (2010). Methanogenic pathway,  $^{13}\text{C}$  isotope fractionation, and archaeal community composition in the sediment of two clear-water lakes of Amazonia. *Limnol Oceanogr* **55**: 689-702.

De Schampelaire L, Cabezas A, Marzorati M, Friedrich MW, Boon N, Verstraete W. (2010). Microbial community analysis of anodes from sediment microbial fuel cells powered by rhizodeposits of living rice plants. *Appl Environ Microbiol* **76**: 2002-2008.

Ehrhardt CJ, Haymon RM, Lamontagne MG, Holden PA. (2007). Evidence for hydrothermal Archaea within the basaltic flanks of the East Pacific Rise. *Environ Microbiol* **9**: 900-912.

Fagervold SK, Galand PE, Zbinden M, Gaill F, Lebaron P, Palacios C. (2012). Sunken woods on the ocean floor provide diverse specialized habitats for microorganisms. *FEMS Microbiol Ecol* **82**: 616-628.

Fan X, Wu QL. (2014). Intra-habitat differences in the composition of the methanogenic archaeal community between the Microcystis-dominated and the macrophyte-dominated bays in Taihu Lake. *Geomicrobiol J* **31**: 907-916.

Feazel LM, Baumgartner LK, Peterson KL, Frank DN, Harris JK, Pace NR. (2009). Opportunistic pathogens enriched in showerhead biofilms. *Proc Natl Acad Sci USA* **106**: 16393-16399.

Fedotova AV, Belova SE, Kulichevskaya IS, Dedysh SN. (2012). Molecular identification of filterable bacteria and archaea in the water of acidic lakes of northern Russia. *Microbiology* **81**: 281-287.

Fedotova AV, Serkebaeva YM, Sorokin VV, Dedysh SN. (2013). Filterable microbial forms in the Rybinsk water reservoir. *Microbiology* **82**: 728-734.

Fu L, Song T, Lu Y. (2015). Snapshot of methanogen sensitivity to temperature in Zoige wetland from Tibetan plateau. *Front Microbio* **6**.

Galand PE, Lovejoy C, Vincent WF. (2006). Remarkably diverse and contrasting archaeal communities in a large arctic river and the coastal Arctic Ocean. *Aquat Microb Ecol* **44**: 115-126.

Galand PE, Lovejoy C, Pouliot J, Garneau M-È, Vincent WF. (2008a). Microbial community diversity and heterotrophic production in a coastal Arctic ecosystem: A stamukhi lake and its source waters. *Limnol Oceanogr* **53**: 813-823.

Galand PE, Lovejoy C, Pouliot J, Vincent WF. (2008b). Heterogeneous archaeal communities in the particle-rich environment of an arctic shelf ecosystem. *J Mar Syst* **74**: 774-782.

Galand PE, Gutiérrez-Provecho C, Massana R, Gasol JM, Casamayor EO. (2010). Inter-annual recurrence of archaeal assemblages in the coastal NW Mediterranean Sea (Blanes Bay Microbial Observatory). *Limnol Oceanogr* **55**: 2117-2125.

Ge T, Wu X, Liu Q, Zhu Z, Yuan H, Wang W *et al.* (2016). Effect of simulated tillage on microbial autotrophic CO<sub>2</sub> fixation in paddy and upland soils. *Sci Rep* **6**.

Gracas DA, Miranda PR, Barauna RA, McCulloch JA, Ghilardi R, Jr., Schneider MP *et al.* (2011). Microbial diversity of an anoxic zone of a hydroelectric power station reservoir in Brazilian Amazonia. *Microb Ecol* **62**: 853-861.

Green TJ, Barnes AC, Bartkow M, Gale D, Grinham A. (2012). Sediment bacteria and archaea community analysis and nutrient fluxes in a subtropical polymictic reservoir. *Aquat Microb Ecol* **65**: 287-302.

Høj L, Olsen RA, Torsvik VL. (2008). Effects of temperature on the diversity and community structure of known methanogenic groups and other archaea in high Arctic peat. *ISME J* **2**: 37-48.

Haller L, Tonolla M, Zopfi J, Peduzzi R, Wildi W, Pote J. (2011). Composition of bacterial and archaeal communities in freshwater sediments with different contamination levels (Lake Geneva, Switzerland). *Water Res* **45**: 1213-1228.

Hallsworth JE, Yakimov MM, Golyshin PN, Gillion JL, D'Auria G, de Lima Alves F *et al.* (2007). Limits of life in MgCl<sub>2</sub>-containing environments: chaotrophicity defines the window. *Environ Microbiol* **9**: 801-813.

Hawkins AN (2013). Southern Appalachian peatlands sustain unique assemblages of Archaea, Appalachian State University.

Kaku N, Ueki A, Ueki K, Watanabe K. (2005). Methanogenesis as an important terminal electron accepting process in estuarine sediment at the mouth of Orikasa River. *Microbes Environ* **20**: 41-52.

Kan J, Clingenpeel S, Macur RE, Inskeep WP, Loyalvo D, Varley J *et al.* (2011). Archaea in yellowstone lake. *ISME J* **5**: 1784-1795.

- Kato S, Kobayashi C, Kakegawa T, Yamagishi A. (2009). Microbial communities in iron-silica-rich microbial mats at deep-sea hydrothermal fields of the Southern Mariana Trough. *Environ Microbiol* **11**: 2094-2111.
- Kato S, Takano Y, Kakegawa T, Oba H, Inoue K, Kobayashi C *et al.* (2010). Biogeography and biodiversity in sulfide structures of active and inactive vents at deep-sea hydrothermal fields of the Southern Mariana Trough. *Appl Environ Microbiol* **76**: 2968-2979.
- Kato S, Nakawake M, Ohkuma M, Yamagishi A. (2012). Distribution and phylogenetic diversity of cbbM genes encoding RubisCO form II in a deep-sea hydrothermal field revealed by newly designed PCR primers. *Extremophiles* **16**: 277-283.
- Katsuyama C, Nashimoto H, Nagaosa K, Ishibashi T, Furuta K, Kinoshita T *et al.* (2013). Occurrence and potential activity of denitrifiers and methanogens in groundwater at 140 m depth in Pliocene diatomaceous mudstone of northern Japan. *FEMS Microbiol Ecol* **86**: 532-543.
- Kimura H, Mori K, Tashiro T, Kato K, Yamanaka T, Ishibashi J-I *et al.* (2010). Culture-independent estimation of optimal and maximum growth temperatures of archaea in subsurface habitats based on the G+ C content in 16S rRNA gene sequences. *Geomicrobiol J* **27**: 114-122.
- Kolukirik M, Ince O, Cetecioglu Z, Celikkol S, Ince B. (2011). Spatial and temporal changes in microbial diversity of the Marmara Sea Sediments. *Mar Pollut Bull* **62**: 2384-2394.
- Kormas KA, Tamaki H, Hanada S, Kamagata Y. (2009). Apparent richness and community composition of Bacteria and Archaea in geothermal springs. *Aquat Microb Ecol* **57**: 113-122.
- Kou W, Zhang J, Lu X, Ma Y, Mou X, Wu L. (2016). Identification of bacterial communities in sediments of Poyang Lake, the largest freshwater lake in China. *SpringerPlus* **5**: 1.
- Ley RE, Harris JK, Wilcox J, Spear JR, Miller SR, Bebout BM *et al.* (2006). Unexpected diversity and complexity of the Guerrero Negro hypersaline microbial mat. *Appl Environ Microbiol* **72**: 3685-3695.
- Li J, Zhang J, Liu L, Fan Y, Li L, Yang Y *et al.* (2015). Annual periodicity in planktonic bacterial and archaeal community composition of eutrophic Lake Taihu. *Sci Rep* **5**: 15488.

Lin B, Lu Y. (2015). Bacterial and archaeal guilds associated with electrogenesis and methanogenesis in paddy field soil. *Geoderma* **259**: 362-369.

Liu GC, Tokida T, Matsunami T, Nakamura H, Okada M, Sameshima R *et al.* (2012). Microbial community composition controls the effects of climate change on methane emission from rice paddies. *Environ Microbiol Rep* **4**: 648-654.

Liu R, Zhang Y, Ding R, Li D, Gao Y, Yang M. (2009). Comparison of archaeal and bacterial community structures in heavily oil-contaminated and pristine soils. *J Biosci Bioeng* **108**: 400-407.

Liu Y, Yao T, Gleixner G, Claus P, Conrad R. (2013). Methanogenic pathways, <sup>13</sup>C isotope fractionation, and archaeal community composition in lake sediments and wetland soils on the Tibetan Plateau. *Journal of Geophysical Research: Biogeosciences* **118**: 650-664.

Liu Y, Li H, Liu QF, Li YH. (2015). Archaeal communities associated with roots of the common reed (*Phragmites australis*) in Beijing Cuihu Wetland. *World J Microbiol Biotechnol* **31**: 823-832.

Liu Y, Wang P, Crowley D, Liu X, Chen J, Li L *et al.* (2016a). Methanogenic abundance and changes in community structure along a rice soil chronosequence from east China. *Eur J Soil Sci*.

Liu Y, Wang P, Pan G, Crowley D, Li L, Zheng J *et al.* (2016b). Functional and structural responses of bacterial and fungal communities from paddy fields following long-term rice cultivation. *J Soils Sed* **16**: 1460-1471.

Lu Y, Fu L, Lu Y, Hugenholtz F, Ma K. (2015). Effect of temperature on the structure and activity of a methanogenic archaeal community during rice straw decomposition. *Soil Biol Biochem* **81**: 17-27.

Ma K, Lu Y. (2011). Regulation of microbial methane production and oxidation by intermittent drainage in rice field soil. *FEMS Microbiol Ecol* **75**: 446-456.

Mbadinga SM, Li KP, Zhou L, Wang LY, Yang SZ, Liu JF *et al.* (2012). Analysis of alkane-dependent methanogenic community derived from production water of a high-temperature petroleum reservoir. *Appl Microbiol Biotechnol* **96**: 531-542.

Mochimaru H, Uchiyama H, Yoshioka H, Imachi H, Hoaki T, Tamaki H *et al.* (2007). Methanogen Diversity in Deep Subsurface Gas-Associated Water at the Minami-Kanto Gas Field in Japan. *Geomicrobiol J* **24**: 93-100.

- Moss JA, McCurry C, Tominack S, Romero IC, Hollander D, Jeffrey WH *et al.* (2015). Ciliated protists from the nepheloid layer and water column of sites affected by the Deepwater Horizon oil spill in the Northeastern Gulf of Mexico. *Deep Sea Research Part I: Oceanographic Research Papers* **106**: 85-96.
- Moussard H, Moreira D, Cambon-Bonavita M-A, López-García P, Jeanthon C. (2006). Uncultured Archaea in a hydrothermal microbial assemblage: phylogenetic diversity and characterization of a genome fragment from a euryarchaeote. *FEMS Microbiol Ecol* **57**: 452-469.
- Nakagawa S, Takai K, Inagaki F, Chiba H, Ishibashi J-i, Kataoka S *et al.* (2005a). Variability in microbial community and venting chemistry in a sediment-hosted backarc hydrothermal system: impacts of subseafloor phase-separation. *FEMS Microbiol Ecol* **54**: 141-155.
- Nakagawa S, Takai K, Inagaki F, Hirayama H, Nunoura T, Horikoshi K *et al.* (2005b). Distribution, phylogenetic diversity and physiological characteristics of epsilon-Proteobacteria in a deep-sea hydrothermal field. *Environ Microbiol* **7**: 1619-1632.
- Narihiro T, Hori T, Nagata O, Hoshino T, Yumoto I, Kamagata Y. (2011). The impact of aridification and vegetation type on changes in the community structure of methane-cycling microorganisms in Japanese wetland soils. *Bioscience, biotechnology, and biochemistry* **75**: 1727-1734.
- Nazina TN, Safonov AV, Kosareva IM, Ivoilov VS, Poltarau AB, Ershov BG. (2010). Microbiological Processes in the Severnyi Deep Disposal Site for Liquid Radioactive Wastes. *Microbiology* **79**: 528-537.
- Nazina TN, Shestakova NM, Pavlova NK, Tatarkin YV, Ivoilov VS, Khisametdinov MR *et al.* (2013). Functional and phylogenetic microbial diversity in formation waters of a low-temperature carbonate petroleum reservoir. *Int Biodeterior Biodegrad* **81**: 71-81.
- Nelson KA, Moin NS, Bernhard AE. (2009). Archaeal diversity and the prevalence of Crenarchaeota in salt marsh sediments. *Appl Environ Microbiol* **75**: 4211-4215.
- Nishizawa T, Komatsuzaki M, Kaneko N, Ohta H. (2008). Archaeal diversity of upland rice field soils assessed by the terminal restriction fragment length polymorphism method combined with real time quantitative-PCR and a clone library analysis. *Microbes Environ* **23**: 237-243.
- Niu Q, Kobayashi T, Takemura Y, Kubota K, Li Y-Y. (2015). Evaluation of functional microbial community's difference in full-scale and lab-scale anaerobic digesters feeding with different organic solid waste: Effects of substrate and operation factors. *Bioresour Technol* **193**: 110-118.



- Pag e A, Tivey MK, Stakes DS, Reysenbach AL. (2008). Temporal and spatial archaeal colonization of hydrothermal vent deposits. *Environ Microbiol* **10**: 874-884.
- Papineau D, Walker JJ, Mojzsis SJ, Pace NR. (2005). Composition and structure of microbial communities from stromatolites of Hamelin Pool in Shark Bay, Western Australia. *Appl Environ Microbiol* **71**: 4822-4832.
- Penning H, Conrad R. (2006). Effect of inhibition of acetoclastic methanogenesis on growth of archaeal populations in an anoxic model environment. *Appl Environ Microbiol* **72**: 178-184.
- Pouliot J, Galand PE, Lovejoy C, Vincent WF. (2009). Vertical structure of archaeal communities and the distribution of ammonia monooxygenase A gene variants in two meromictic High Arctic lakes. *Environ Microbiol* **11**: 687-699.
- Probst AJ, Castelle CJ, Singh A, Brown CT, Anantharaman K, Sharon I *et al.* (2017). Genomic resolution of a cold subsurface aquifer community provides metabolic insights for novel microbes adapted to high CO<sub>2</sub> concentrations. *Environ Microbiol* **19**: 459-474.
- Pump J, Pratscher J, Conrad R. (2015). Colonization of rice roots with methanogenic archaea controls photosynthesis-derived methane emission. *Environ Microbiol* **17**: 2254-2260.
- Qiu Q, Zhang D, Ye X, Zheng Z. (2013). The bacterial community of coastal sediments influenced by cage culture in Xiangshan Bay, Zhejiang, China. *Shengtai Xuebao/Acta Ecologica Sinica* **33**: 483-491.
- Rinke C, Schwientek P, Sczyrba A, Ivanova NN, Anderson IJ, Cheng JF *et al.* (2013). Insights into the phylogeny and coding potential of microbial dark matter. *Nature* **499**: 431-437.
- Robertson CE, Spear JR, Harris JK, Pace NR. (2009). Diversity and stratification of archaea in a hypersaline microbial mat. *Appl Environ Microbiol* **75**: 1801-1810.
- Rudolph C, Moissl C, Henneberger R, Huber R. (2004). Ecology and microbial structures of archaeal/bacterial strings-of-pearls communities and archaeal relatives thriving in cold sulfidic springs. *FEMS Microbiol Ecol* **50**: 1-11.

Sánchez O, Garrido L, Forn I, Massana R, Maldonado MI, Mas J. (2011). Molecular characterization of activated sludge from a seawater-processing wastewater treatment plant. *Microb Biotechnol* **4**: 628-642.

Sahl JW, Pace NR, Spear JR. (2008). Comparative molecular analysis of endoevaporitic microbial communities. *Appl Environ Microbiol* **74**: 6444-6446.

Sahl JW, Fairfield N, Harris JK, Wettergreen D, Stone WC, Spear JR. (2010). Novel Microbial Diversity Retrieved by Autonomous Robotic Exploration of the World's Deepest Vertical Phreatic Sinkhole. *Astrobiology* **10**: 201-213.

Segawa T, Sugiyama A, Kinoshita T, Sohrin R, Nakano T, Nagaosa K *et al.* (2014). Microbes in Groundwater of a Volcanic Mountain, Mt. Fuji; 16S rDNA Phylogenetic Analysis as a Possible Indicator for the Transport Routes of Groundwater. *Geomicrobiol J* **32**: 677-688.

Siegert M, Cichocka D, Herrmann S, Gründger F, Feisthauer S, Richnow H-H *et al.* (2011). Accelerated methanogenesis from aliphatic and aromatic hydrocarbons under iron- and sulfate-reducing conditions. *FEMS Microbiol Lett* **315**: 6-16.

Silveira CB, Cardoso AM, Coutinho FH, Lima JL, Pinto LH, Albano RM *et al.* (2013). Tropical aquatic Archaea show environment-specific community composition. *PLoS One* **8**: e76321.

Stoeva MK, Aris-Brosou S, Chélat J, Hintelmann H, Pelletier P, Poulain AJ. (2014). Microbial community structure in lake and wetland sediments from a high Arctic polar desert revealed by targeted transcriptomics. *PLoS One* **9**: e89531.

Sun P, Gu C, Ren F, Dai X, Dong Z. (2010). Prokaryotic microbial phylogenetic diversity of "Eryuan Niujie" hot spring in Yunnan province, China. *Acta Microbiol Sin* **50**: 1510-1518.

Swan BK, Ehrhardt CJ, Reifel KM, Moreno LI, Valentine DL. (2010). Archaeal and bacterial communities respond differently to environmental gradients in anoxic sediments of a California hypersaline lake, the Salton Sea. *Appl Environ Microbiol* **76**: 757-768.

Takai K, Horikoshi K. (1999). Genetic diversity of archaea in deep-sea hydrothermal vent environments. *Genetics* **152**: 1285-1297.

Turque AS, Batista D, Silveira CB, Cardoso AM, Vieira RP, Moraes FC *et al.* (2010). Environmental shaping of sponge associated archaeal communities. *PLoS One* **5**: e15774.

- Wang L-Y, Li W, Mbadinga SM, Liu J-F, Gu J-D, Mu B-Z. (2012). Methanogenic microbial community composition of oily sludge and its enrichment amended with alkanes incubated for over 500 days. *Geomicrobiol J* **29**: 716-726.
- Wang P, Xiao X, Wang F. (2005). Phylogenetic analysis of Archaea in the deep-sea sediments of west Pacific Warm Pool. *Extremophiles* **9**: 209-217.
- Watanabe K, Kodama Y, Hamamura N, Kaku N. (2002). Diversity, Abundance, and Activity of Archaeal Populations in Oil-Contaminated Groundwater Accumulated at the Bottom of an Underground Crude Oil Storage Cavity. *Appl Environ Microbiol* **68**: 3899-3907.
- Wilhelm RC, Niederberger TD, Greer C, Whyte LG. (2011). Microbial diversity of active layer and permafrost in an acidic wetland from the Canadian High Arctic. *Can J Microbiol* **57**: 303-315.
- Wu L, Ma K, Li Q, Ke X, Lu Y. (2009). Composition of archaeal community in a paddy field as affected by rice cultivar and N fertilizer. *Microb Ecol* **58**: 819-826.
- Wu Y-H, Liao L, Wang C-S, Ma W-L, Meng F-X, Wu M *et al.* (2013). A comparison of microbial communities in deep-sea polymetallic nodules and the surrounding sediments in the Pacific Ocean. *Deep Sea Research Part I: Oceanographic Research Papers* **79**: 40-49.
- Xing W, Zhao Y, Zuo J-E. (2010). Microbial activity and community structure in a lake sediment used for psychrophilic anaerobic wastewater treatment. *J Appl Microbiol* **109**: 1829-1837.
- Yoshida-Takashima Y, Nunoura T, Kazama H, Noguchi T, Inoue K, Akashi H *et al.* (2012). Spatial distribution of viruses associated with planktonic and attached microbial communities in hydrothermal environments. *Appl Environ Microbiol* **78**: 1311-1320.
- Zhou L, Li KP, Mbadinga SM, Yang SZ, Gu JD, Mu BZ. (2012). Analyses of n-alkanes degrading community dynamics of a high-temperature methanogenic consortium enriched from production water of a petroleum reservoir by a combination of molecular techniques. *Ecotoxicology* **21**: 1680-1691.
- Zumsteg A, Luster J, Gäransson H, Smittenberg RH, Brunner I, Bernasconi SM *et al.* (2012). Bacterial, archaeal and fungal succession in the forefield of a receding glacier. *Microb Ecol* **63**: 552-564.
